# Supplementary material for: Assessment of the psychometric properties of the eHealth Literacy Scale for Brazilian adolescents
Source: PubMed Central journal article supplement (PMC11588242; doi:10.1371/journal.pone.0314099), 2024-11-25
Supplement: pone.0314099.s001.pdf [file pone.0314099.s001.pdf]

Adolescent's Identification Number: (DO NOT FILL THIS FIELD): \_\_\_\_\_

YOUR FULL NAME: \_\_\_\_\_

For the questions in the chart below, I would like to know your opinion and experience in the use of the Internet to obtain information on health. **There are no right or wrong answers.** For each statement, mark the answer that best reflects your opinion and experience at the moment.

1. I know **how** to find useful health information/resources on the Internet.

- a) I fully disagree
- b) I disagree
- c) I am not sure
- d) I agree
- e) I fully agree

2. I know **how to use** the Internet to answer my questions about health.

- a) I fully disagree
- b) I disagree
- c) I am not sure
- d) I agree
- e) I fully agree

3. I know **what** health resources are available on the Internet.

- a) I fully disagree
- b) I disagree
- c) I am not sure
- d) I agree
- e) I fully agree

4. I know **where** to find useful health information/resources on the Internet.

- a) I fully disagree
- b) I disagree
- c) I am not sure
- d) I agree
- e) I fully agree

5. I know how to use **the health information** that I find on the internet to help me.

- a) I fully disagree
- b) I disagree
- c) I am not sure
- d) I agree
- e) I fully agree

6. I have the skills I need to **evaluate** health information/resources that I find on the internet.

- a) I fully disagree
- b) I disagree
- c) I am not sure
- d) I agree
- e) I fully agree

7. I can differentiate health information/resources that are of **high quality** from those that are of **low quality** on the internet.

- a) I fully disagree
- b) I disagree
- c) I am not sure
- d) I agree
- e) I fully agree

8. I feel **confident** in using information from the Internet to make health decisions.

- a) I fully disagree
- b) I disagree
- c) I am not sure
- d) I agree
- e) I fully agree

***Thank you!***

Nº de identificação do adolescente: (NÃO PREENCHER ESTE CAMPO): \_\_\_\_\_  
SEU NOME COMPLETO: \_\_\_\_\_

Para as questões abaixo, eu gostaria de saber sua opinião e sua experiência no uso da Internet para buscar informações sobre saúde. **Não existem respostas certas ou erradas.** Para cada afirmação, marque a resposta que melhor reflete sua opinião e sua experiência neste momento.

Considere “**Recursos de saúde**” como todas as formas de usar a internet relacionada a saúde.

1. Eu sei **como** encontrar informações/recursos úteis de saúde na Internet.

- a) Discordo totalmente
- b) Discordo em parte
- c) Não tenho certeza
- d) Concordo em parte
- e) Concordo totalmente

2. Eu sei **como usar** a Internet para responder as minhas dúvidas sobre saúde.

- a) Discordo totalmente
- b) Discordo em parte
- c) Não tenho certeza
- d) Concordo em parte
- e) Concordo totalmente

3. Eu sei **quais** os recursos de saúde que estão disponíveis na Internet.

- a) Discordo totalmente
- b) Discordo em parte
- c) Não tenho certeza
- d) Concordo em parte
- e) Concordo totalmente

4. Eu sei **onde** encontrar informações/recursos úteis de saúde na Internet.

- a) Discordo totalmente
- b) Discordo em parte
- c) Não tenho certeza
- d) Concordo em parte
- e) Concordo totalmente

5. Eu sei como usar **as informações de saúde** que encontro na internet para me ajudar.

- a) Discordo totalmente
- b) Discordo em parte
- c) Não tenho certeza
- d) Concordo em parte
- e) Concordo totalmente

6. Eu **tenho as habilidades** necessárias para avaliar as informações/recursos de saúde que encontro na internet.

- a) Discordo totalmente

- b) Discordo em parte
- c) Não tenho certeza
- d) Concordo em parte
- e) Concordo totalmente

7. Eu consigo diferenciar as informações/recursos de saúde de **alta qualidade** das de **baixa qualidade** na internet.

- a) Discordo totalmente
- b) Discordo em parte
- c) Não tenho certeza
- d) Concordo em parte
- e) Concordo totalmente

8. Eu me sinto **confiante** em usar as informações da Internet para tomar decisões sobre saúde.

- a) Discordo totalmente
- b) Discordo em parte
- c) Não tenho certeza
- d) Concordo em parte
- e) Concordo totalmente

***OBRIGADA!***
